# Supplementary material for: Overexpression and Selective Anticancer Efficacy of ENO3 in STK11 Mutant Lung Cancers
Source: PubMed Central journal article supplement — Mol Cells. 2019 Nov 7;42(11):804–9. doi: 10.14348/molcells.2019.0099 (PMC6883975; doi:10.14348/molcells.2019.0099), 2019-11-07
Supplement: molce-42-804_suppl.pdf [file molce-42-804_suppl.pdf]

**Supplementary Table 1. Selection of STK11-mutant LUAD cell lines from CCLE database**

| Cell line | Lineage    | Variant classification | cDNA change   | Protein change | Allele frequency | Mutation zygosity |
|-----------|------------|------------------------|---------------|----------------|------------------|-------------------|
| MORCPR    | LUNG NSCLC | Nonsense Mutation      | c.388G>T      | p.E130*        | 1                | Homo              |
| NCIH23    | LUNG NSCLC | Nonsense Mutation      | c.996G>A      | p.W332*        | 1                | Homo              |
| A549      | LUNG NSCLC | Nonsense Mutation      | c.109C>T      | p.Q37*         | 0.99             | Homo              |
| NCIH838   | LUNG NSCLC | Frame Shift Del        | c.632delG     | p.R211fs       | 0.99             | Homo              |
| NCIH1395  | LUNG NSCLC | Frame Shift Del        | c.165delG     | p.L55fs        | 0.96             | Homo              |
| NCIH1755  | LUNG NSCLC | Frame Shift Del        | c.837delC     | p.G279fs       | 0.94             | Homo              |
| NCIH1355  | LUNG NSCLC | Frame Shift Del        | c.142delA     | p.K48fs        | 0.88             | Homo              |
| NCIH2122  | LUNG NSCLC | Frame Shift Del        | c.837delC     | p.G279fs       | 0.88             | Homo              |
| HCC44     | LUNG NSCLC | Frame Shift Ins        | c.152_153insC | p.M51fs        | 0.81             | Homo              |

A total of 9 cell lines harbored homozygous STK11 loss-of-function mutations.

\*chain termination, fs: Frame shift.
